# Supplementary material
Source: PubMed Central journal article supplement (PMC5360304)

SUPPLEMENTARY DATA

**Supplementary Figure S1. AAT decreases C-peptide and TAT levels *in vitro*.** (A) C-peptide level in the *in vitro* miniature tube model from islets treated with blood (Ctrl), islets treated with AAT and blood (AAT) and islets cultured with complete medium (Medium). (B) TAT levels in the *in vitro* miniature tube model from islets treated with blood, compared to islets treated with AAT and blood. \*  $P < 0.05$ , Student's *t* test.

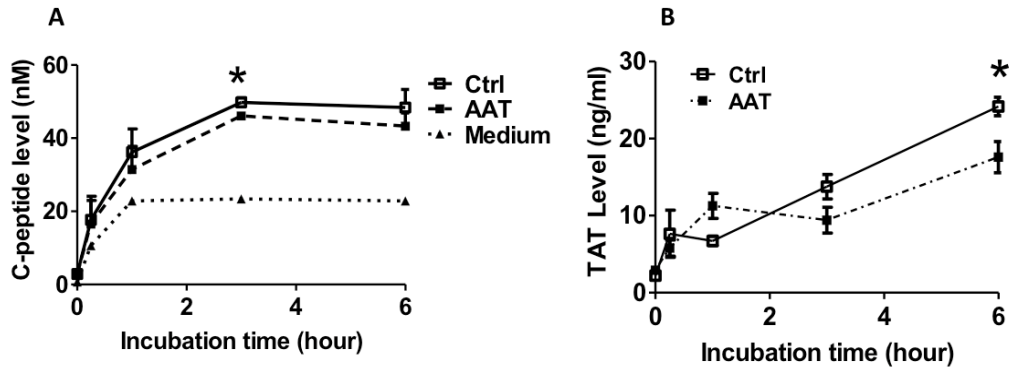

SUPPLEMENTARY DATA

**Supplementary Figure S2. AAT reduces cytokine-induced human islet cell death as analyzed by TUNEL assay.** (A) TUNEL staining of human islets incubated with cytokine cocktail for 72 hours in the presence or absence of 0.5 mg/ml AAT. (B) Fewer TUNEL<sup>+</sup> cells per islets were observed in AAT treated human islets when exposed to cytokine. More than 20 islets were counted in each group. \*  $p < 0.05$  by one-way ANOVA with Turkey post test analysis.

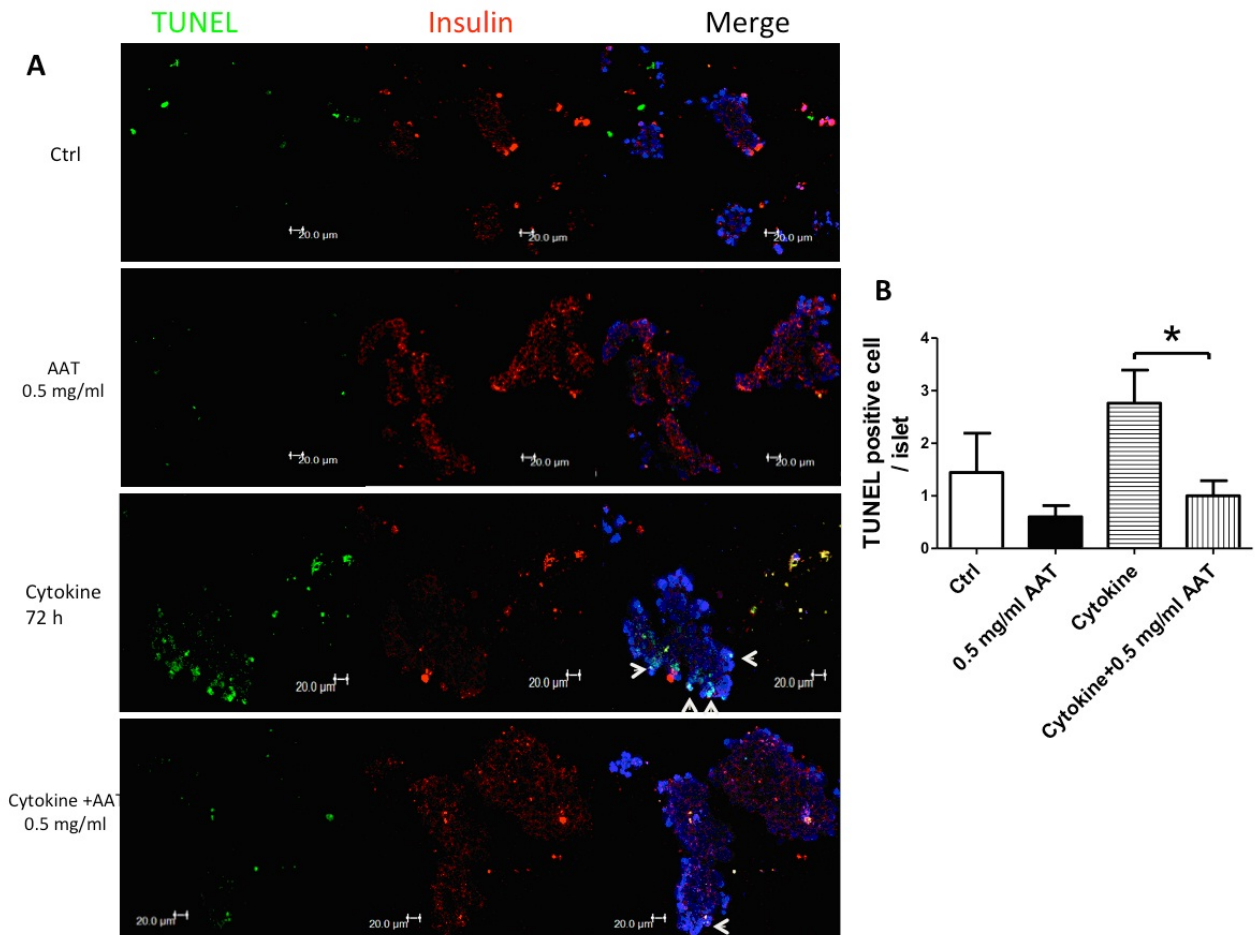

Supplement: DB161036SupplementaryData.pdf [file DB161036SupplementaryData.pdf]
